# Supplementary material
Source: PubMed Central journal article supplement (PMC2094259)
Supplement: thorax_thx.2006.070474_4.pdf [file thorax_thx.2006.070474_4.pdf]

1 **Online Data Supplement**

2 **Comparison of gel contraction mediated by asthmatic and non-asthmatic airway**  
3 **smooth muscle cells**

4

5 **Hisako Matsumoto, Lyn M Moir, Brian G G Oliver, Janette K Burgess, Michael**  
6 **Roth, Judith L Black, Brent E McParland**

7

8 Correspondence;

9 Hisako Matsumoto

10 **Discipline** of Pharmacology, University of Sydney, NSW 2006, Australia

11 Tel: 61-2-935-16735

12 Fax: 61-2-935-13868

13 **Present address**

14 **Department of Respiratory Medicine, Kyoto University, Kyoto, Japan**

15 e-mail: [hmatsumo@kuhp.kyoto-u.ac.jp](mailto:hmatsumo@kuhp.kyoto-u.ac.jp), [BrentMcParland@med.usyd.edu.au](mailto:BrentMcParland@med.usyd.edu.au)

16

**17 Online Data Supplement: Methods****18 Study population and cell culture**

19 ASM cells were obtained from 9 non-asthmatic and 8 asthmatic patients and were  
20 propagated as previously described [1]. Approval for all experiments using human lung  
21 cells was provided by the Human Ethics Committees of the University of Sydney and  
22 the South West Sydney Area Health Service. Characteristics of ASM cells were  
23 determined by immuno-fluorescence and light microscopy (Fig. E1). Cells from  
24 passages 3 to 8 were grown to confluence using Dulbecco's modified Eagle's medium  
25 (DMEM) supplemented with 5% FBS and were harvested by trypsin digestion and used  
26 for experiments.

27

**28 Collagen gel contraction assay using ASM**

29 A collagen-gel contraction assay was used to examine the contractile capacity of ASM  
30 cells. Harvested cells were resuspended in DMEM containing 0.1% BSA at a density of  
31  $5 \times 10^5$  cells/ml. A collagen solution (3 mg/ml) was made on ice by mixing rat tail  
32 collagen type I (BD Biosciences, NSW, Australia) with 1 x PBS, 1N NaOH and 0.02N  
33 acetic acid according to the manufacturer's instructions. The collagen solution was  
34 mixed with the cell suspension 1:1 to yield a final collagen concentration of 1.5 mg/ml.  
35 The collagen suspension containing the ASM cells, 0.6 ml ( $1.5 \times 10^5$  cells), was cast in  
36 one well of a 24-well culture plate and allowed to polymerize (30 min, 37°C) in a  
37 humidified 5% CO<sub>2</sub> incubator. Once polymerized the lateral surface of a gel was  
38 carefully detached from the culture well and transferred into a 6-well plate containing 3

39 ml of DMEM with 0.1% BSA. Gels containing ASM cells contracted spontaneously  
40 after detachment from the casting plates, approaching a plateau at 12 hours (Fig. E2). To  
41 avoid the initial contraction, which was thought to reflect cytoskeletal reorganization or  
42 stress fiber formation [2] rather than agonist-induced actomyosin-driven contraction *per*  
43 *se*, floating gels were equilibrated overnight in 6-well plates containing 3 ml of DMEM  
44 with 0.1% BSA (37°C), and then the medium was changed to modified Krebs solution  
45 before being stimulated (method 1, Fig 1A). For a comparison between non-asthmatic  
46 and asthmatic ASM cells, gels stimulated immediately after detachment (method 2, Fig  
47 1A) were also examined. For method 2, collagen gels, once polymerized, were  
48 overlaid with 0.4 ml of DMEM with 0.1% BSA and incubated overnight in 24-well  
49 casting plates without being detached. Stimulation was performed no later than 5  
50 minutes after detachment from 24-well plates and floated in 6-well plates.

51 During gel contraction the culture plate was placed on a flat-bed scanner  
52 (Microtek. Inc. Taiwan) in a non-humidified oven (Thermoline Scientific. Pty. Ltd.  
53 NSW, Australia) maintained at 37°C. Gels were scanned automatically every 2 min over  
54 20 min. The surface area of each gel was then measured using Image J  
55 (<http://rsb.info.nih.gov/ij/>) and gel contraction was measured at each time point as the  
56 ratio of treated gel area to untreated gel area (control) to account for any change in gel  
57 area not caused by the treatment.

58

### 59 **Reagents and antibodies**

60 Modified Krebs Henseleit physiological salt solution containing 58.44 mM NaCl, 74.55  
61 mM KCl, 147 mM CaCl<sub>2</sub>·2H<sub>2</sub>O, 203.3 mM MgCl<sub>2</sub>·6H<sub>2</sub>O, 180.16 mM glucose, and  
62 238.3 mM HEPES was used during stimulation of the gels. Contraction induced by

63 histamine 100  $\mu$ M was not altered by carbogenation (5% CO<sub>2</sub> in O<sub>2</sub>), therefore all  
64 experiments were performed in the absence of carbogenation.

65 Histamine, carbachol, adenosine 5'-triphosphate (ATP), mepyramine,  
66 formoterol, prostaglandin E<sub>2</sub> and inhibitors of phospholipase C (PLC) (U73122),  
67 MLCK (ML-7), and Rho-associated coiled-coil forming kinase (ROCK) (Y27632) were  
68 purchased from Sigma (St Louis, MO). Formoterol, prostaglandin E<sub>2</sub>, U73122 and  
69 ML-7 were diluted in ethanol: 0.01%, 0.0025%, 1%, and 0.15%, respectively. Other  
70 compounds were diluted in distilled water for stock.

71 Mouse monoclonal anti- $\alpha$ -smooth muscle actin FITC conjugated antibody  
72 (clone 1A4) and mouse anti-myosin light chain kinase (MLCK) antibody (clone K36)  
73 were from Sigma, mouse anti-GAPDH antibody from CHEMICON (Temecula, CA),  
74 and goat anti-mouse horseradish peroxidase-conjugated secondary antibody from  
75 DakoCytomation (Carpinteria, CA).

76

#### 77 **Viability assay**

78 Viability and cell number in the gels was estimated using  
79 3-(4,5-dimethylthiazol-2-yl)-5-(3-carboxymethoxyphenyl)-2-(4-sulfophenyl)-2H-tetrazo  
80 lium (MTS) (Promega, NSW, Australia). A total of 25  $\mu$ l of the ASM cell-containing  
81 collagen solution was cast into one well of a 96-well plate and 75  $\mu$ l of DMEM with  
82 0.1% BSA was added after gel polymerization, before incubation at 37°C overnight.  
83 After one hour incubation with 20  $\mu$ l of MTS, absorption at 490 nm was measured with  
84 spectrophotometer. Experiments were done in duplicate. Trypan blue exclusion test was  
85 also used to examine cell viability.

86

**87 Western Blotting**

88 Protein expression of smooth muscle MLCK (smMLCK) was analyzed by Western  
89 blotting and enhanced chemiluminescence. To obtain protein from airway smooth  
90 muscle (ASM) cells embedded in collagen gels the cells were harvested by digesting the  
91 collagen with collagenase (600 units/ml, Sigma) for 30 min at 37°C. However, this  
92 process of cell extraction resulted in degradation of smMLCK. Therefore, smMLCK  
93 protein content was measured for ASM cells seeded ( $2 \times 10^4/\text{cm}^2$ ) onto collagen-coated  
94 6-well plates ( $5 \mu\text{g}/\text{cm}^2$ ) and left overnight before being lysed in a buffer containing 1  
95 mM EDTA, 20 mM Tris, 10% proteinase inhibitor (Calbiochem Inc., San Diego, CA),  
96 0.5% Triton X-100. After centrifugation (10,000 g, 2 min), the supernatant was  
97 collected. Protein concentration was determined using a bicinchoninic acid protein  
98 assay kit (Sigma) and 10  $\mu\text{g}$  of protein/lane was applied to an 8% SDS-polyacrylamide  
99 gel. Proteins were transferred to polyvinylidene difluoride membranes and blocked in  
100 PBS containing 0.05% Tween-20 and 1% skimmed-milk powder. Membranes were  
101 incubated with mouse anti-MLCK antibody (1:20,000) in blocking solution for 2 h at  
102 room temperature. Secondary goat anti-mouse antibody conjugated with horseradish  
103 peroxidase (1:4,000) was incubated for 1 h at room temperature and visualized by  
104 enhanced chemiluminescence (SuperSignal® West Dura Extended Duration Substrate;  
105 Pierce Biotechnology Inc., Rockford, IL). As an internal control, the expression of  
106 GAPDH was examined after stripping the membrane with 0.1 M 2-mercaptoethanol,  
107 2% SDS and 62.5 mM Tris-HCl (pH 6.7) for 20 min at 50°C. The stripped membranes  
108 were again blocked and incubated with mouse anti-GAPDH (1:6,000), followed by  
109 incubation with secondary antibody (1:16,000) and visualized by enhanced  
110 chemiluminescence. Experiments were done in duplicate.

111 **Online Data Supplement: References**

112

113 1. Johnson PR, Roth M, Tamm M, *et al.* Airway smooth muscle cell proliferation is  
114 increased in asthma. *Am J Respir Crit Care Med* 2001; **164**:474-7.

115 2. Kuzuya M, Cheng XW, Sasaki T, *et al.* Pitavastatin, a  
116 3-hydroxy-3-methylglutaryl-coenzyme A reductase inhibitor, blocks vascular smooth  
117 muscle cell populated-collagen lattice contraction. *J Cardiovasc Pharmacol* 2004;  
118 **43**:808-14.

119

120 **Online Data Supplement: Figure legends**

121 **Figure E1. Representative non-asthmatic and asthmatic airway smooth muscle cells**  
122 **stained with FITC conjugated anti- $\alpha$ -smooth muscle actin antibody.**

123

124 **Figure E2.** Time course showing gel contraction without exogenous stimulation. Gels  
125 containing airway smooth muscle cells contracted and approached a plateau at 12 hours  
126 (n = 3 different patients, solid line), while gels without cells did not contract (n = 3,  
127 dotted line).

128

129 **Figure E3.** A) Gel contraction to histamine, 1, 10 and 100  $\mu$ M (n = 6 different patients).  
130 **Contraction curves to histamine 1, 10 and 100 $\mu$ M were significantly different from that**  
131 **of untreated gels (p < 0.0001). A significant difference was also observed between**  
132 **contraction curves to 1 $\mu$ M and 100 $\mu$ M histamine (p = 0.003). Results are shown as**  
133 **contraction (% decrease in gel area). B) Inhibition of histamine (100  $\mu$ M)-induced gel**  
134 **contraction by mepyramine (1  $\mu$ M; n = 6). C) Relaxation of histamine (100**  
135  **$\mu$ M)-induced gel contraction by formoterol (1  $\mu$ M; n = 4). **Contraction curves to**  
136 **histamine treated with mepyramine or formoterol were significantly different from that**  
137 **generated to histamine alone (p  $\leq$  0.05). D) Inhibition of histamine (100  $\mu$ M)-induced**  
138 **gel contraction by prostaglandin E<sub>2</sub> (100 nM, 1  $\mu$ M, 10  $\mu$ M; n = 4). Curves to histamine**  
139 **treated with each concentration of prostaglandin E<sub>2</sub> were all significantly different from**  
140 **that of histamine alone (p < 0.001). Results are shown as % decrease in gel area relative**  
141 **to control untreated gels (FigE3ABD). For Fig E3C, gel area at 20 min was set as 100%.****

142
